# Supplementary material for: Longitudinal SARS-CoV-2 seroprevalence in Portugal and antibody maintenance 12 months after the start of the COVID-19 pandemic
Source: Research Square preprint supplement (doi:10.21203/rs.3.rs-603060/v1), 2021-06-21
Supplement: Supplementary file 1 [file 7d68f6439987bbbae8f98e52.pdf]

# **Longitudinal SARS-CoV-2 seroprevalence in Portugal and antibody maintenance 12 months after the start of the COVID-19 pandemic**

## **AUTHORS' CONTRIBUTIONS (CRediT Taxonomy)**

### **Luísa Canto e Castro**

Email: [ldloura@fc.ul.pt](mailto:ldloura@fc.ul.pt)

Degree: PhD

Contribution: Conceptualization, methodology, software, formal analysis, investigation, methodology, validation, visualization, writing – original draft, and writing – review & editing

### **Andreia Gomes**

Email: [andreia.gomes@medicina.ulisboa.pt](mailto:andreia.gomes@medicina.ulisboa.pt)

Degree: PhD

Contribution: Methodology, resources, investigation, validation, and writing – review & editing.

### **Marta Serrano**

Email: [marta.serrano@medicina.ulisboa.pt](mailto:marta.serrano@medicina.ulisboa.pt)

Degree: BSc

Contribution: Methodology, resources, investigation, validation, and writing – review & editing.

### **Ana Helena Guia Pereira**

Email: [apereira@germanodesousa.com](mailto:apereira@germanodesousa.com)

Degree: BSc

Contribution: Investigation, methodology, and writing – review & editing.

### **Rita Ribeiro**

Email: [rribeiro@cm-lab.com](mailto:rribeiro@cm-lab.com)

Degree: BSc

Contribution: Investigation, validation, methodology, and writing – review & editing.

### **Patrícia Napoleão**

Email: [pnapoleao@medicina.ulisboa.pt](mailto:pnapoleao@medicina.ulisboa.pt)

Degree: PhD

Contribution: Data curation, project administration, and writing – review & editing.

### **Inês Domingues**

Email: [inesdomingues@medicina.ulisboa.pt](mailto:inesdomingues@medicina.ulisboa.pt)

Degree: PhD

Contribution: Data curation, funding acquisition, project administration, and writing – review & editing.

**Cláudia Silva**

Email: amsilva@medicina.ulisboa.pt

Degree: BSc

Contribution: Project administration, and writing – review & editing.

**Júlia Fanczal**

Email: julia.fanczal@medicina.ulisboa.pt

Degree: PhD

Contribution: Methodology, resources, investigation, validation, and writing – review & editing.

**Ângela Afonso**

Email: angelaafonso@medicina.ulisboa.pt

Degree: MSc

Contribution: Methodology, resources, and writing – review & editing.

**Andreia Lopes**

Email: andreia.lopes@medicina.ulisboa.pt

Degree: MSc

Contribution: Methodology, resources, and writing – review & editing.

**Ionela Toader**

Email: ionela.toader@medicina.ulisboa.pt

Degree: MSc

Contribution: Methodology, resources, and writing – review & editing.

**Maria José Rego de Sousa**

Email: mariajsousa@cm-lab.com

Degree: MD, PhD

Contribution: Investigation, resources, methodology, and writing – review & editing.

**José Germano Rego de Sousa**

Email: germanodesousa@germanodesousa.com

Degree: MD

Contribution: Methodology, resources, and writing – review & editing.

**Germano de Sousa**

Email: germanosousa@cm-lab.com

Degree: MD

Contribution: Methodology, resources, and writing – review & editing.

**Maria M. Mota**

Email: mmota@medicina.ulisboa.pt

Degree: PhD

Contribution: Conceptualization, funding acquisition, project administration, and writing – review & editing.

**Bruno Silva-Santos**

Email: [bssantos@medicina.ulisboa.pt](mailto:bssantos@medicina.ulisboa.pt)

Degree: PhD

Contribution: Conceptualization, funding acquisition, project administration, and writing – review & editing.

**Marc Veldhoen**

Email: [marc.veldhoen@medicina.ulisboa.pt](mailto:marc.veldhoen@medicina.ulisboa.pt)

Degree: PhD

Contribution: Conceptualization, investigation, methodology, supervision, validation, writing – original draft, and writing – review & editing.

**Ruy M. Ribeiro**

Email: [ruy@lanl.gov](mailto:ruy@lanl.gov)

Degree: PhD

Contribution: Conceptualization, methodology, software, formal analysis, investigation, validation, writing – original draft, and writing – review & editing
